# Supplementary material for: Guar-Based Injectable Hydrogel for Drug Delivery and In Vitro Bone Cell Growth
Source: MDPI journal article supplement (doi:10.3390/bioengineering10091088), 2023-09-15
Supplement: s1 [file s1]

# Guar-Based Injectable Hydrogel for Drug Delivery and In Vitro Bone Cell Growth

Humendra Poudel <sup>1</sup>, Ambar B. RanguMagar <sup>2</sup>, Pooja Singh <sup>3</sup>, Adeolu Oluremi <sup>3</sup>, Nawab Ali <sup>3</sup>, Fumiya Watanabe <sup>4</sup>, Joseph Batta-Mpouma <sup>5</sup>, Jin Woo Kim <sup>5</sup>, Ahona Ghosh <sup>1</sup> and Anindya Ghosh <sup>1,\*</sup>

<sup>1</sup> Department of Chemistry, University of Arkansas at Little Rock, 2801 South University Avenue, Little Rock, AR 72204, USA; hxpoudel@ualr.edu (H.P.); ahonag7@gmail.com (A.G.)

<sup>2</sup> Department of Chemistry, Philander Smith University, 900 W Daisy L Gatson Bates Dr, Little Rock, AR 72202, USA; arangumagar@philander.edu

<sup>3</sup> Department of Biology, University of Arkansas at Little Rock, 2801 South University Avenue, Little Rock, AR 72204, USA; pxsingh1@ualr.edu (P.S.); asoluremi@ualr.edu (A.O.); nali@ualr.edu (N.A.)

<sup>4</sup> Center for Integrative Nanotechnology Sciences, University of Arkansas at Little Rock, 2801 South University Avenue, Little Rock, AR 72204, USA; fxwatanabe@ualr.edu

<sup>5</sup> Department of Biological and Agricultural Engineering, Bell Engineering Center, University of Arkansas, 4183 Fayetteville, Little Rock, AR 72701, USA; jnbattam@uark.edu (J.B.-M.); jwkim@uark.edu (J.W.K.)

\* Correspondence: axghosh@ualr.edu; Tel.: +501-916-5197; Fax: +501-569-8838

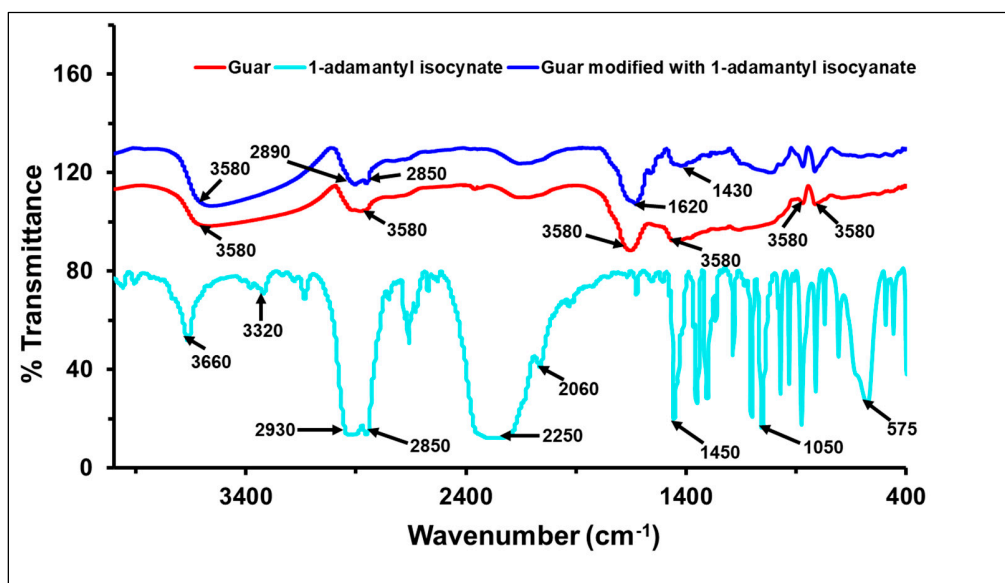

**Figure S1.** Fourier Transform Infrared (FTIR) spectroscopy of guar, 1-Adamantyl isocyanate (ADI), and Guar-ADI.

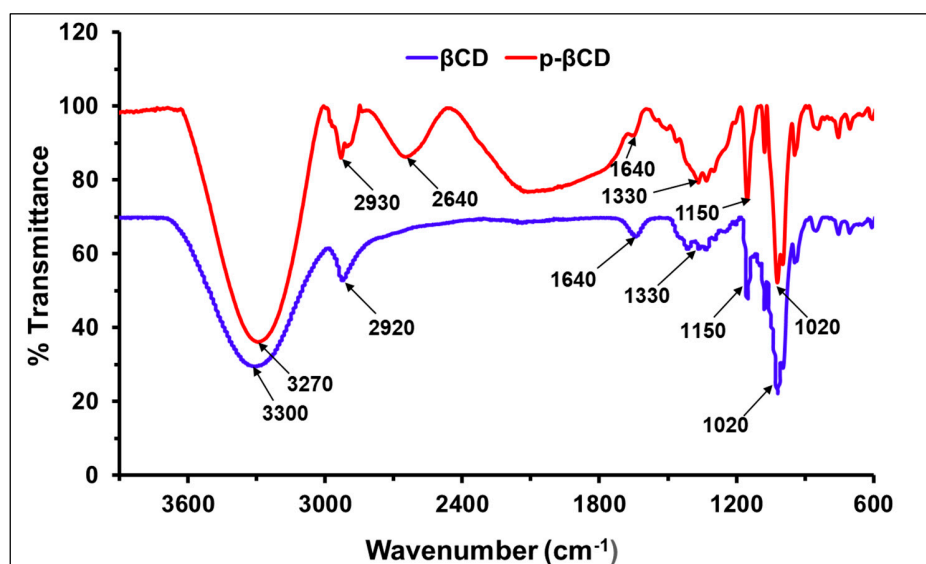

**Figure S2.** Fourier Transform Infrared (FTIR) spectroscopy of  $\beta$ -cyclodextrin ( $\beta$ -CD), and poly- $\beta$ -cyclodextrin (p- $\beta$ -CD).

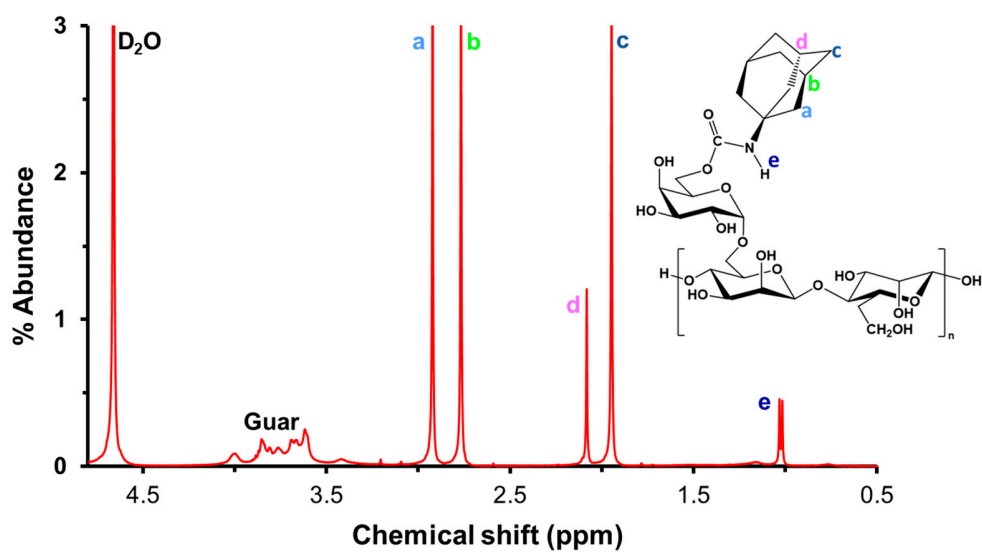

**Figure S3.** Proton Nuclear Magnetic Resonance ( $^1\text{H}$ -NMR) spectroscopy of Guar-ADI

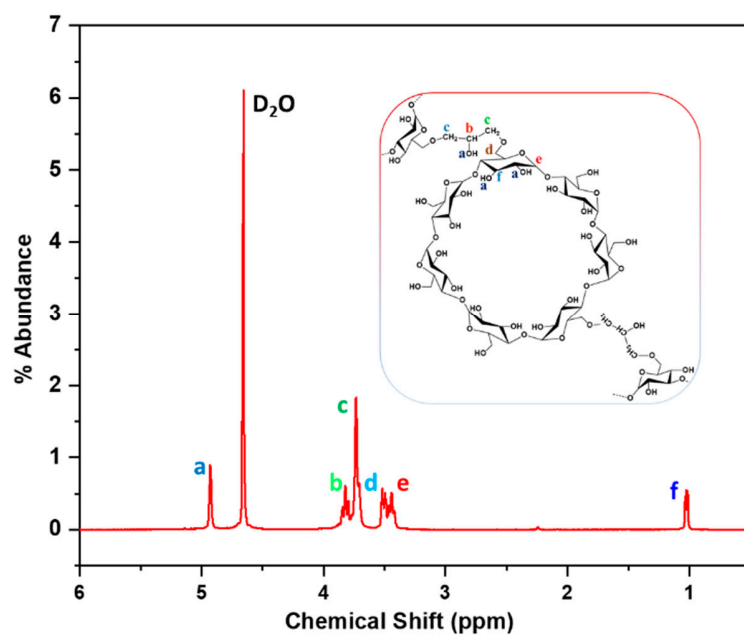

**Figure S4.** Proton Nuclear Magnetic Resonance ( $^1\text{H}$ -NMR) spectroscopy of p- $\beta$ -CD

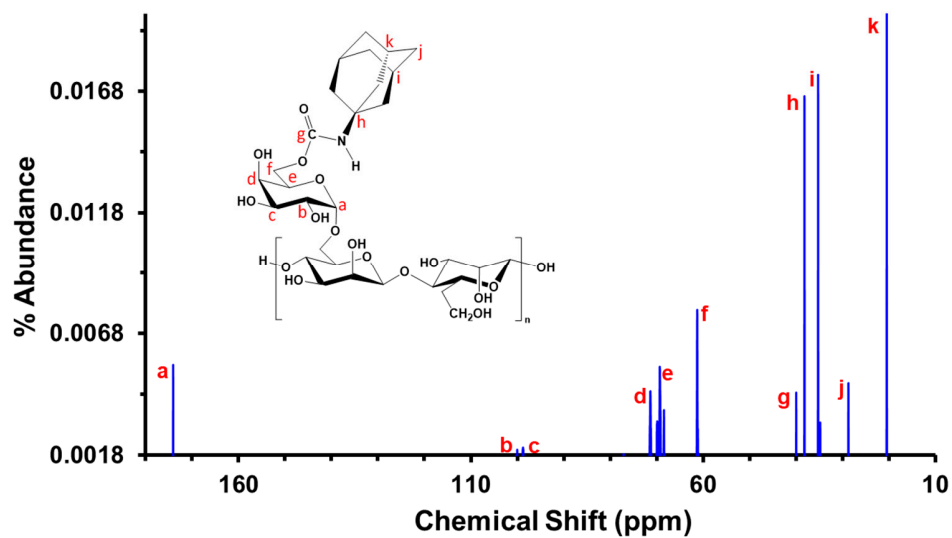

**Figure S5.** Carbon Nuclear Magnetic Resonance ( $^{13}\text{C}$ -NMR) spectroscopy of Guar-ADI

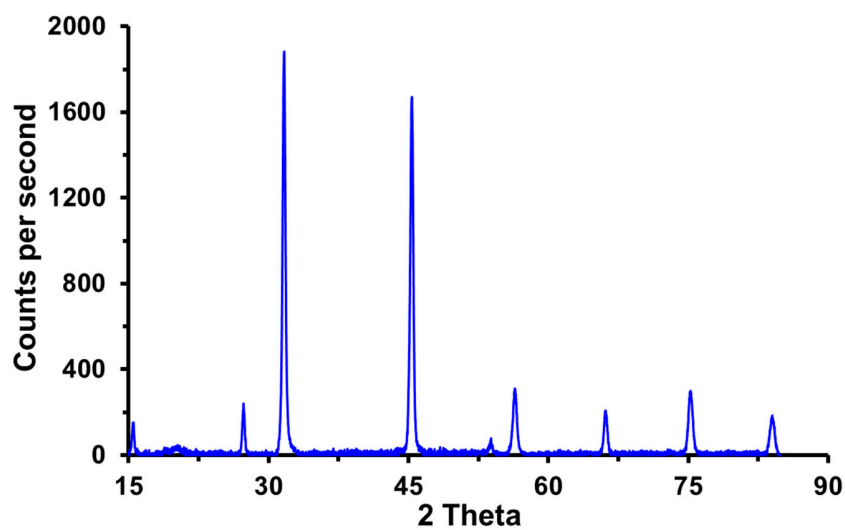

**Figure S6.** X-ray Diffraction (XRD) of 5% hydrogel

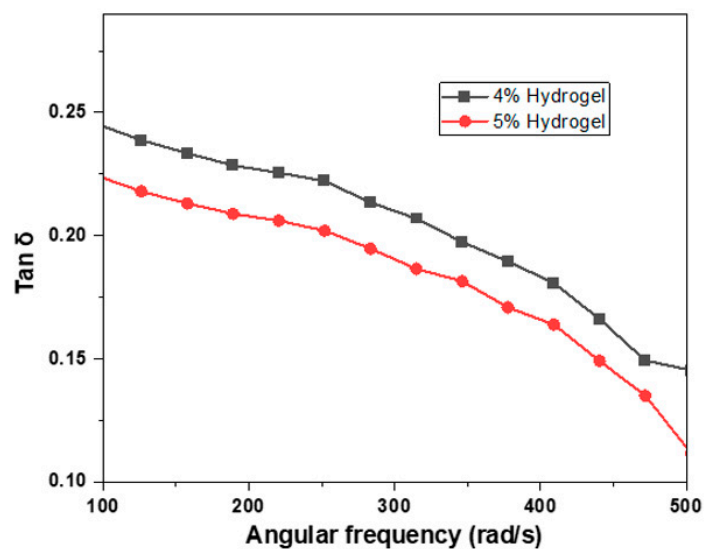

**Figure S7.**  $\tan \delta$  vs. angular frequency of 4%, and 5% hydrogels at room temperature

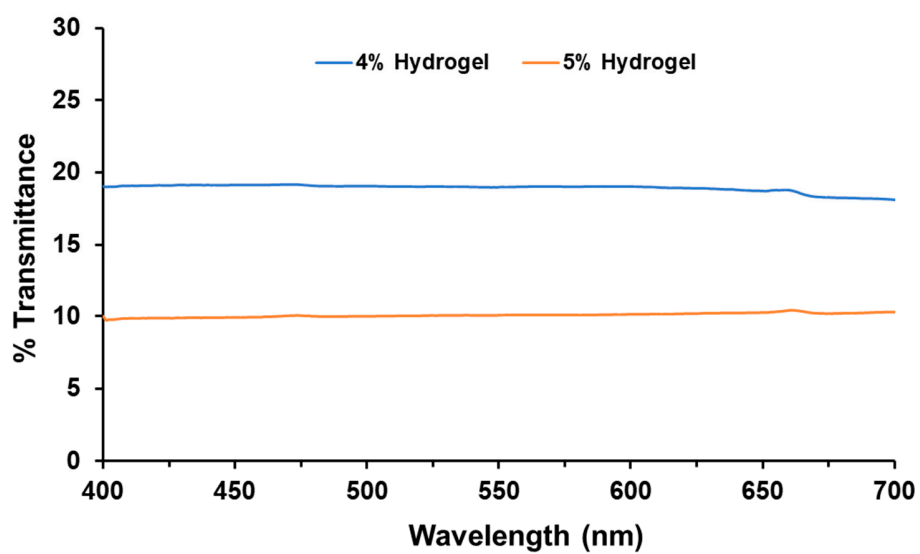

**Figure S8:** UV-Visible spectroscopy of 4% and 5% hydrogel

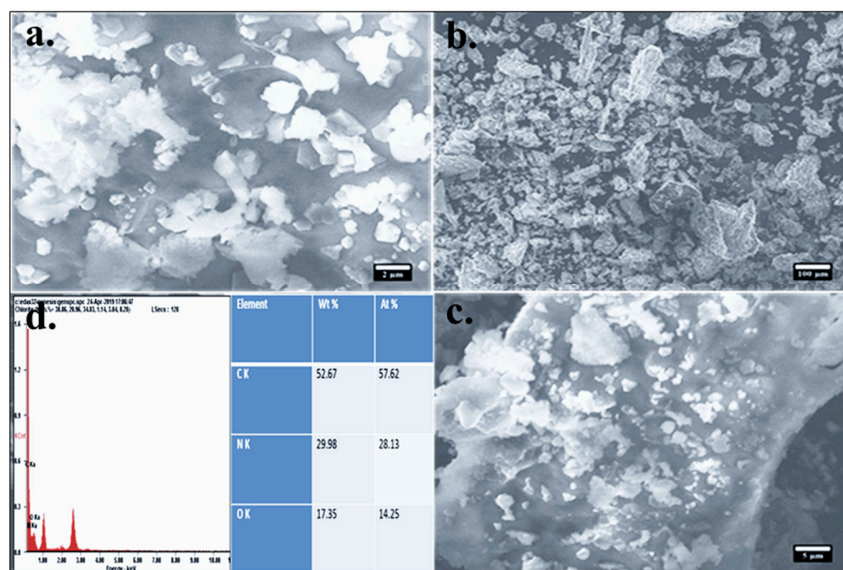

**Figure S9.** Scanning Electron Microscopy (SEM) (**a.** x 5000, **b.** x 100, and **c.** x 2000 magnifications) and **d.** Energy Dispersive Spectroscopy (EDS) of dried 5% hydrogel.

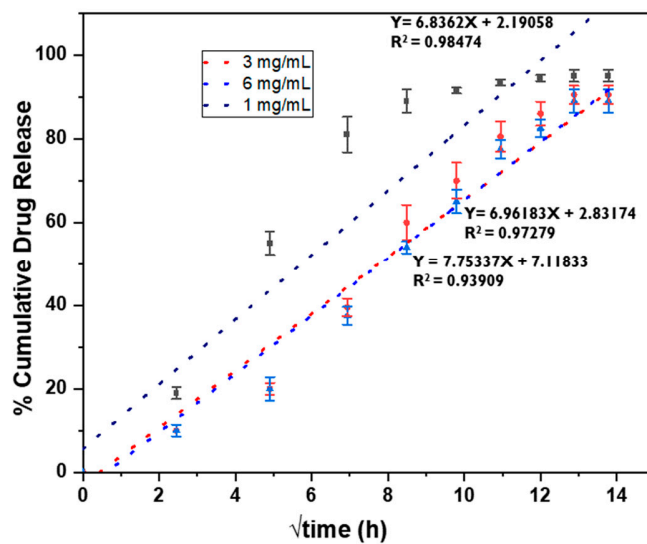

**Figure S10:** Higuchi Model showing percentage (%) cumulative drug release vs. square root of time for BSA release study from 5% hydrogel having 1, 3, and 6 mg/mL BSA at 37°C in PBS (7.4).
